# Supplementary material for: Functional expression of calcium‐permeable canonical transient receptor potential 4‐containing channels promotes migration of medulloblastoma cells
Source: PubMed Central journal article supplement (PMC5556167; doi:10.1113/jp274659), 2017-07-20
Supplement: TJP-595-5525-s001.pdf [file TJP-595-5525-s001.pdf]

**Supplementary Figure 1: Preliminary data leading to study**

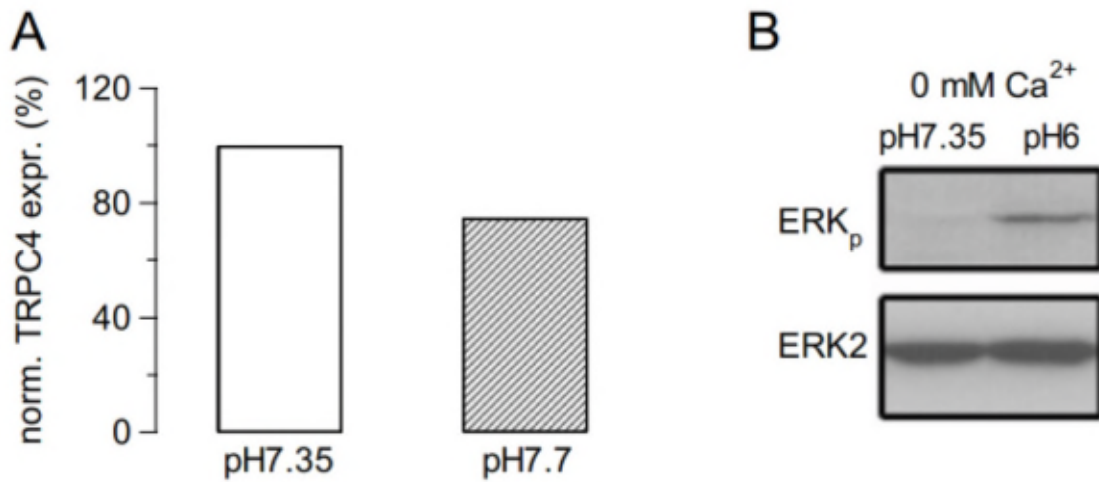

A, qPCR results showing that TRPC4 expression levels, normalised (norm.) to average TRPC4 expression (expr.) at pH7.35, are higher when DAOY cells are cultured at pH7.35 than at pH7.7; n=2 repeats for each pH condition, values shown represent averages of the two repeats.

B, Western Blot showing extent of phosphorylation of ERK protein (ERK<sub>p</sub>) in response to control conditions (in absence of extracellular Ca<sup>2+</sup> at pH7.35) and under test conditions (in absence of extracellular Ca<sup>2+</sup> at pH6); 10 min exposure time for both conditions. Experiments were performed in primary granule cells at DIV1. ERK2 protein levels served as internal control.
